# Supplementary material for: A unifying conceptual model for the environmental responses of isoprene emissions from plants
Source: PubMed Central journal article supplement (PMC3806535; doi:10.1093/aob/mct206), 2013-09-19
Supplement: supp_mct206_mct206supp.pdf [file supp_mct206_mct206supp.pdf]

## SUPPLEMENTARY DATA

### A1. MEGAN - G93 (Guenther et al., 1993, 2006)

MEGAN is the most widely used model for prediction of isoprene emission from vegetation. This model was built on the Guenther et al. (1993) algorithm (G93) where the emission rate of isoprene (Iso) is calculated by multiplying a species-specific standard emission rate ( $I_s$ ) by a set of empirical equations taking in account changes in environmental factors. The standard conditions for estimation of  $I_s$  are a leaf temperature of 30°C and a PAR of 1000  $\mu\text{mol m}^{-2} \text{s}^{-1}$ . For this study, we used the Guenther et al. (1993) algorithm (G93), where solely changes in PAR and temperature are taken in account:

$$\text{Iso} = I_s C_L C_T, \quad (\text{A1})$$

with

$$C_L = \alpha C_{L1} \text{PAR} / \sqrt{(1 + \alpha^2 \text{PAR}^2)} \quad (\text{A1a})$$

$$C_T = \exp ( C_{T1} (T - T_s) / (R T_s T) ) / ( C_{T3} + \exp ( C_{T2} (T - T_m) / (R T_s T) ) ) \quad (\text{A1b})$$

$T$  (K) is the leaf temperature,  $T_s$  is the temperature at standard conditions (= 303 K),  $R$  is the gas constant (= 8.314  $\text{J K}^{-1} \text{mol}^{-1}$ ), PAR is the photosynthetically active radiation.  $C_{L1}$ ,  $\alpha$ ,  $C_{T1}$ ,  $C_{T2}$ ,  $C_{T3}$  and  $T_m$  are empirical coefficients:

$C_{L1} = 1.066$ ,  $\alpha = 0.027$ ,  $C_{T1} = 95\,000 \text{ J mol}^{-1}$ ,  $C_{T2} = 230\,000 \text{ J mol}^{-1}$ ,  $C_{T3} = 0.961 \text{ J mol}^{-1}$  and  $T_m = 314 \text{ K}$ .

## A2. Niinemets model (Niinemets et al., 1999)

The Niinemets model is based on quantifying the NADPH cost for isoprene synthesis.

It builds on the Farquhar model of photosynthesis.

The general concept is that a temperature-dependent fraction of the electron flux ( $\varepsilon$ ) is used for isoprene production.

$$\varepsilon = J_{\text{iso}} / J_{\text{tot}}, \quad (\text{A2})$$

Where  $J_{\text{iso}}$  is the electrons flux required for a certain isoprene production (Iso) and  $J_{\text{tot}}$  is the total photosynthetic electron flux.

The total electron flux is approximated from the Farquhar model as follows:

$$J_{\text{tot}} \approx J_{\text{CO}_2+\text{O}_2} = (A_{j_{\text{net}}} + R_d) (4 c_i + 8 \Gamma^*) / (c_i - \Gamma^*), \quad (\text{A2a})$$

where  $A_{j_{\text{net}}}$  is the net light-limited carbon assimilation,  $R_d$  the dark respiration,  $c_i$  internal  $\text{CO}_2$  concentration and  $\Gamma^*$  the  $\text{CO}_2$  compensation point in the absence of dark respiration.

Given that one molecule of isoprene requires six carbon atoms and that the NADPH cost per molecule of carbon is 1.17 higher for isoprene production than for carbon assimilation, the electron flux needed for a given isoprene production Iso is calculated by:

$$J_{\text{iso}} = 6 \text{ Iso } 1.17 (4 c_i + 8 \Gamma^*) / (c_i - \Gamma^*), \quad (\text{A2b})$$

Rearranging, we obtain:

$$\text{Iso} = \varepsilon J_{\text{tot}} (c_i - \Gamma^*) / (7.02 (4 c_i + 8 \Gamma^*))$$

$$= \varepsilon / 7.02 A_j, \quad (\text{A2c})$$

where  $A_j$  is the gross assimilation under light-limited conditions.

The fraction of electrons allocated to isoprene production is calculated as from Arneeth et al. (2007) and Pacifico et al. (2011):

$$\varepsilon = \varepsilon_s \tau, \quad (\text{A2d})$$

where  $\varepsilon_s$  is the fraction of electrons for isoprene production under the standard conditions of leaf temperature of  $T_s = 30^\circ\text{C}$  and PAR of  $1000 \mu\text{mol m}^{-2} \text{s}^{-1}$  and  $\tau = \min\{\exp[0.1 (T - T_s)] ; 2.3\}$ , is a function which mimics the enzymatic response reported by Niinemets et al. (1999).

#### A1. Model of photosynthetic carbon assimilation (Farquhar et al., 1980)

The model for photosynthetic carbon assimilation is based on the Farquhar model (Farquhar et al., 1980). Temperature responses of the different parameters are described in Medlyn et al. (2002), and based on previous work from (Harley et al., 1986; Long, 1991; Harley et al., 1992; Harley and Baldocchi, 1995; Lloyd et al., 1995; Bernacchi et al., 2001).

*Calculation of the light limited electron flux (J):*

$$J = ((\alpha\text{PAR} + J_{\max}) - \sqrt{((\alpha\text{PAR} + J_{\max})^2 - 4\alpha\theta J_{\max}\text{PAR})}) / (2\theta) \quad (\text{A3a})$$

$$J_{\max} = J_{\max 25} \cdot \exp(E_{aJ} (1/298.15 - 1/T) / R). J_1/J_2 \quad (\text{A3b})$$

$$J_1 = 1 + \exp((298.15 \Delta S - E_{dJ}) / R / 298.15) \quad (\text{A3c})$$

$$J_2 = 1 + \exp((T \Delta S - E_{dJ}) / R / T) \quad (\text{A3d})$$

$J_{\max 25}$  is the value of  $J_{\max}$  at 25°C,  $\alpha = 0.385$  mol electron mol<sup>-1</sup> photon,  $\theta$  is a curvature parameter of the light curve response and T is the temperature in K. Other symbols are summarized in Table A1.1

*Calculation of the maximum Rubisco capacity  $V_{\max}$ ,  $\Gamma^*$ ,  $K_c$ ,  $K_o$ :*

$$V_{\max} = V_{\max 25} \exp(E_a (1/298.15 - 1/T) / R) \quad (\text{A3e})$$

$$K_c = 404.9 \exp(79430 (T - 298.15)/(298.15 RT)) \quad (\text{A3f})$$

$$K_o = 278.4 \exp(36380 (T - 298.15)/(298.15 RT)) \quad (\text{A3g})$$

$$\Gamma^* = 42.75 \exp(37830 (T - 298.15)/(298.15 RT)) \quad (\text{A3h})$$

$V_{\max 25}$  is the value of  $V_{\max}$  at 25°C,  $K_c$  and  $K_o$  are the Michaelis coefficients of Rubisco for CO<sub>2</sub> and O<sub>2</sub> respectively and  $\Gamma^*$  is the CO<sub>2</sub> compensation point in the absence of dark respiration. Other symbols are summarized in Table A1.1

**Table A1.1** Description and values of the parameters of Farquhar model used in standard simulations (Medlyn et al., 2005)

| Symbol     | Definition                                 | Unit                               | Value  |
|------------|--------------------------------------------|------------------------------------|--------|
| $E_{aJ}$   | Activation energy for J                    | $\text{kJ mol}^{-1}$               | 38.670 |
| $E_{dJ}$   | Desactivation energy for J                 | $\text{kJ mol}^{-1}$               | 200    |
| $E_a$      | Activation energy for $V_{\text{cmax}}$    | $\text{kJ mol}^{-1}$               | 58.520 |
| $E_d$      | Desactivation energy for $V_{\text{cmax}}$ | $\text{kJ mol}^{-1}$               | 200    |
| $\Delta S$ | Entropy term                               | $\text{kJ mol}^{-1} \text{K}^{-1}$ | 0.6381 |

**Table A1.2** Values of the parameters of Farquhar and isoprene models for Fig. 3 and Fig.6

| Symbol              | Unit                                 | Value (Fig.3)       | Value (Fig.6)        |
|---------------------|--------------------------------------|---------------------|----------------------|
| $J_{\text{max}25}$  | $\mu\text{mol m}^{-2} \text{s}^{-1}$ | 99.53               | 54.32                |
| $V_{\text{cmax}25}$ | $\mu\text{mol m}^{-2} \text{s}^{-1}$ | 62.8                | 56.9                 |
| a                   | unitless                             | $2.2 \cdot 10^{-4}$ | $4.86 \cdot 10^{-5}$ |
| b                   | unitless                             | $7 \cdot 10^{-5}$   | $5 \cdot 10^{-6}$    |

**Figure A1:** Above canopy isoprene emissions in relation to air temperature for three ranges of PAR - Low (1000-1250  $\mu\text{mol m}^{-2} \text{s}^{-1}$ ), Medium (1250-1500  $\mu\text{mol m}^{-2} \text{s}^{-1}$ ) and High (1500-1750  $\mu\text{mol m}^{-2} \text{s}^{-1}$ ). Data from flux measurements at Harvard Forest.

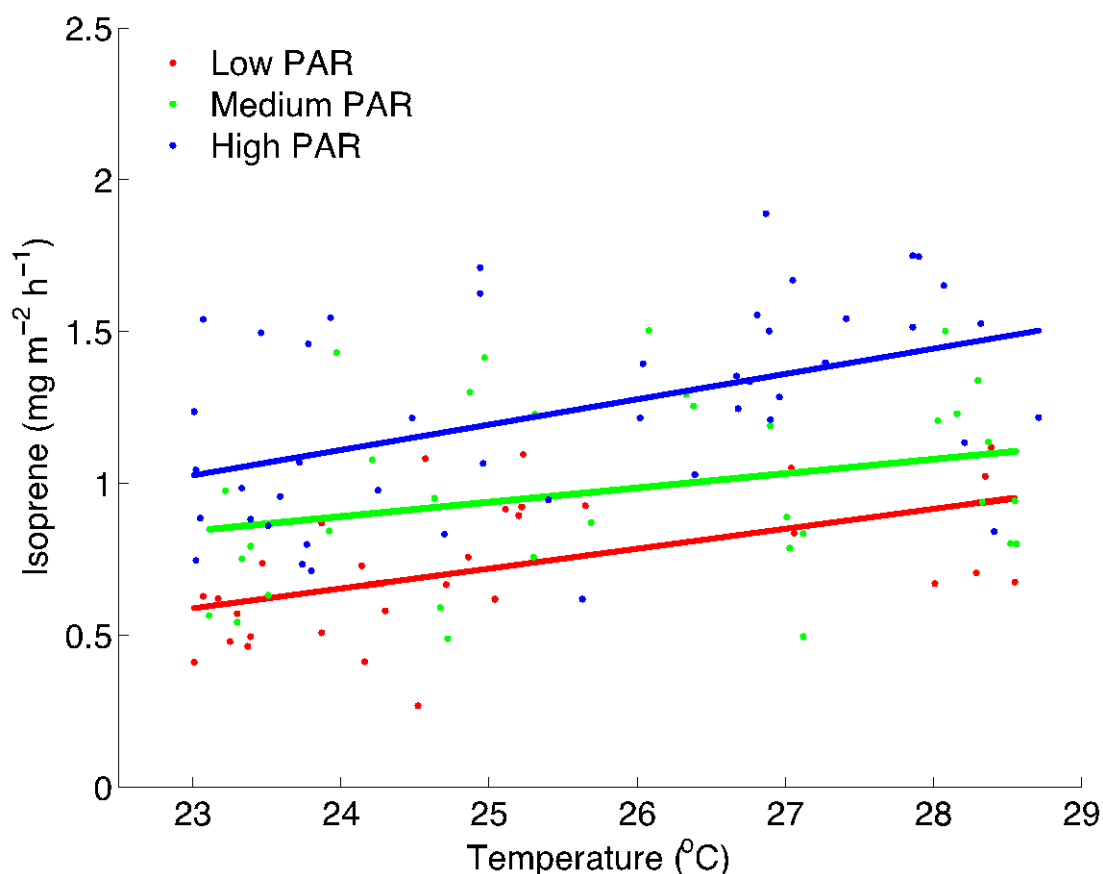

## References

**Arneth A, Niinemets Ü, Pressley S, Bäck J, Hari P, Karl T, Noe S, Prentice I, Serça D, Hickler T, Wolf A, Smith B. 2007.** Process-based estimates of terrestrial ecosystem isoprene emissions: incorporating the effects of a direct CO<sub>2</sub>-isoprene interaction. *Atmospheric Chemistry and Physics* **7**: 31–53.

**Bernacchi CJ, Singaas EL, Pimentel C, Portis ARJ, Long SP. 2001.** Improved temperature response functions for models of Rubisco-limited photosynthesis. *Plant, Cell and Environment* **24**: 253–260.

- Farquhar GD, Von Caemmerer S, Berry JA. 1980.** A Biochemical Model of Photosynthetic CO<sub>2</sub> Assimilation in Leaves of C<sub>3</sub> Species. *Planta* **149**: 78–90.
- Guenther A, Karl T, Harley P, Wiedinmyer C, Palmer PI, Geron C. 2006.** Estimates of global terrestrial isoprene emissions using MEGAN (Model of Emissions of Gases and Aerosols from Nature). *Atmospheric Chemistry and Physics* **6**: 3181–3210.
- Guenther AB, Zimmerman PR, Harley PC, Monson RK, Fall R. 1993.** Isoprene and Monoterpene Emission Rate Variability: Model Evaluations and Sensitivity Analyses. *Journal of Geophysical Research* **98**: 12609–12617.
- Harley PC, Baldocchi D. 1995.** Scaling carbon dioxide and water vapour exchange from leaf to canopy in a deciduous forest. I. Leaf model parametrization. *Plant, Cell and Environment* **18**: 1146–1156.
- Harley PC, Thomas RB, Reynolds JF, Strain BR. 1992.** Modelling photosynthesis of cotton grown in elevated CO<sub>2</sub>. *Plant, Cell and Environment* **15**: 271–282.
- Lloyd J, Grace J, Miranda AC, Meir P, Wong SC, Miranda HS, Wright IR, Gash JHC, McIntyre J. 1995.** A simple calibrated model of Amazon rainforest productivity based on leaf biochemical properties. *Plant, Cell and Environment* **18**: 1129–1145.
- Long SP. 1991.** Modification of the response of photosynthetic productivity to rising temperature by atmospheric CO<sub>2</sub> concentrations: Has its importance been underestimated? *Plant, Cell and Environment* **14**: 729–739.
- Medlyn BE, Dreyer E, Ellsworth D, Forstreuter M, Harley PC, Kirschbaum MUF, Roux XLE. 2002.** Temperature response of parameters of a biochemically based model of photosynthesis . II . A review of experimental data. *Plant, Cell and Environment* **25**: 1167–1179.
- Medlyn BE, Berbigier P, Clement R, Grelle A, Loustau D, Linder S, Wingate L, Jarvis PG, Sigurdsson BD, McMurtrie RE. 2005.** Carbon balance of coniferous forests growing in contrasting climates: Model-based analysis. *Agricultural and Forest Meteorology* **131**: 97–124.
- Niinemets Ü, Tenhunen JD, Harley PC, Steinbrecher R. 1999.** A model of isoprene emission based on energetic requirements for isoprene synthesis and leaf photosynthetic properties for Liquidambar and Quercus. *Plant, Cell and Environment* **22**: 1319–1335.
- Pacifico F, Harrison SP, Jones CD, Arneth A, Sitch S, Weedon GP, Barkley MP, Palmer PI, Serça D, Potosnak M, Fu T-M, Goldstein A, Bai J, Schurgers G. 2011.** Evaluation of a photosynthesis-based biogenic isoprene emission scheme in JULES and simulation of isoprene emissions under present-day climate conditions. *Atmospheric Chemistry and Physics* **11**: 4371–4389.
